# Supplementary material
Source: HighWire-hosted journal article supplement (https://www.jrheum.org/highwire/filestream/42754/field_highwire_adjunct_files/0/220135DataSuppl.pdf)

## Supplementary materials

### Physicians' perspective on vaccination in patients with autoimmune inflammatory rheumatic diseases: an international survey.

Philip Seo, MD, MHS, Kevin Winthrop, MD, MPH, Amr H. Sawalha, MD, Serim Choi, MD, Hyun Ah Park, MD, MPH, PhD, Woochang Hwang, PhD, Eun Bong Lee, MD, PhD, and Jin Kyun Park, MD, PhD

**Figure 1. Rheumatologists' general perspectives on vaccination for patients with autoimmune inflammatory rheumatic disease.** (A) Importance of vaccination (B) Confidence to provide vaccination coverage were rated on 1-5 scale (1=not at all, 5=very important or very confident). (C) Vaccination coverage in practice. (D) Physician who should be responsible for vaccination coverage. ACR=American College of Rheumatology, EULAR=European League against Rheumatism.

**A** Do you agree that vaccination is important for patients with rheumatic diseases?

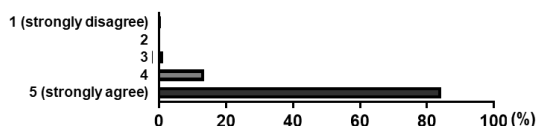

**B** How confident/comfortable do you feel to manage vaccination coverage for your patients with rheumatic diseases?

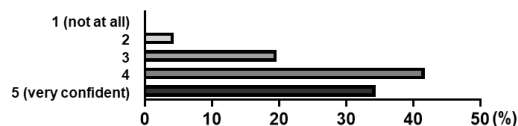

**C** To what percentage of patients do you manage vaccination coverage?

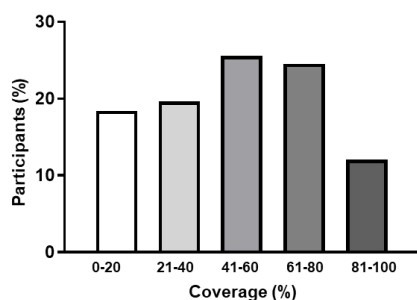

**D** Who should be primarily responsible for the vaccination coverage of patients with rheumatic diseases?

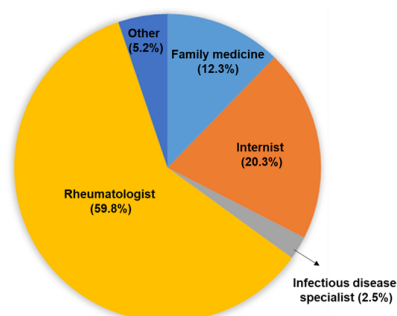

**Figure 2. Familiarity with vaccination guidelines among rheumatologists.** Awareness of vaccination guidelines included in the 2012 and the 2015 ACR guideline for rheumatoid arthritis (RA) treatment and the 2011 and the 2019 vaccination guideline of the European Alliance of Associations for Rheumatology (EULAR) were rated on scale of 1-5. 1 = not at all, 5 = very much. Numbers are in % of participants. ACR = American College of Rheumatology, EULAR = the European Alliance of Associations for Rheumatology

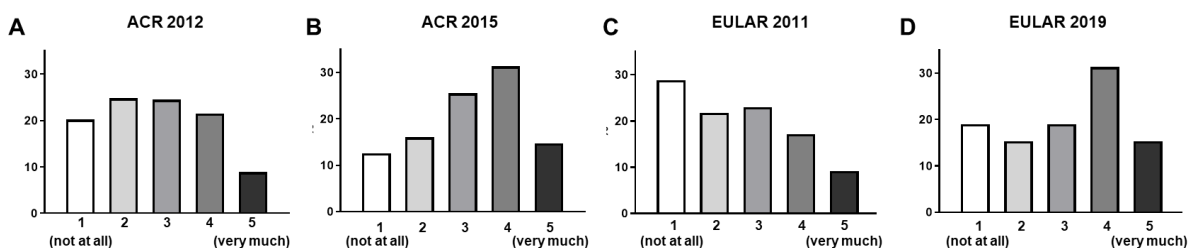

**Figure 3. Reasons for non-adherence to the vaccination guidelines among rheumatologists.** Available time for vaccination, level of vaccine experience, agreement with vaccine safety and efficacy as well as trust in guidelines were rated on scale of 1-5. 1 = not at all, 5 = strongly. Numbers are in % of participants.

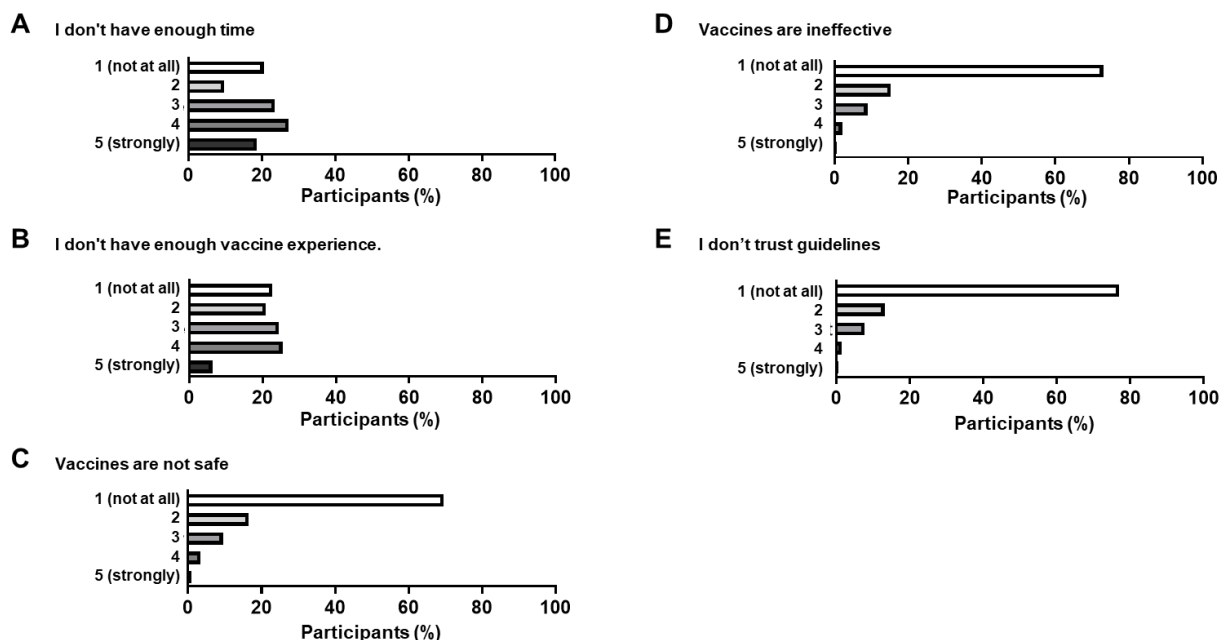

**Figure 4. Rheumatologists' perspective on vaccination by regions.** Familiarity with the ACR 2015 (A) and the EULAR 2019 guideline (B), agreement on the importance (C) and usefulness (D) of the vaccination guidelines as well as level of confidence with vaccination coverage (E) were rated on scale of 1-5. 1 = not at all, 5 = very much. Physicians who should be responsible for vaccination coverage. (F) Vaccination coverage of >60% of patients. Numbers are in % of participants. ACR = American College of Rheumatology, EULAR = the European Alliance of Associations for Rheumatology.

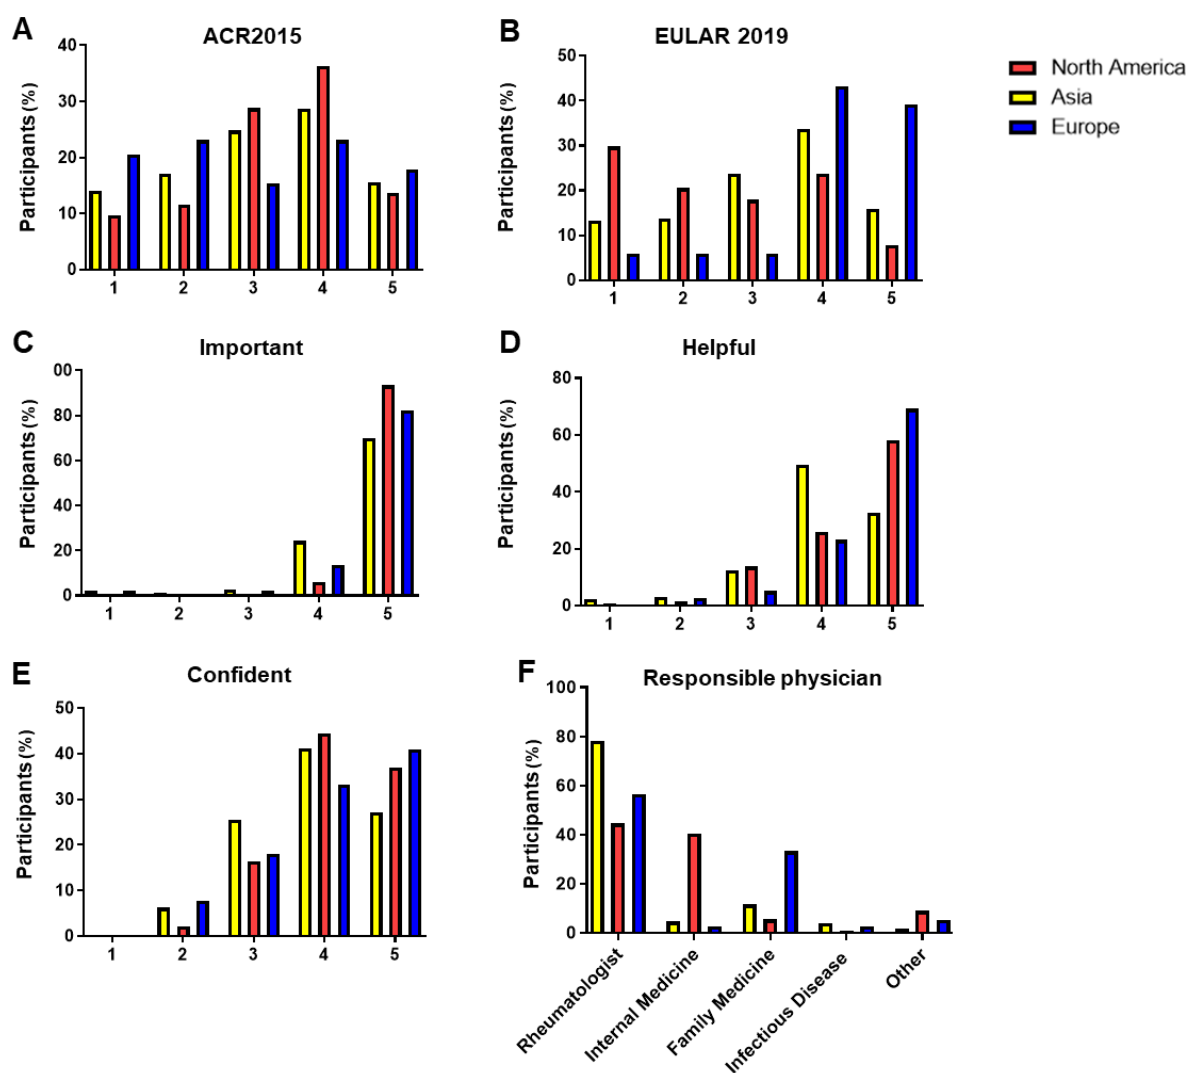

Supplement: 220135DataSuppl.pdf [file 220135DataSuppl.pdf]
